# Supplementary material for: Mfn1-mediated imbalanced mitochondrial dynamics promotes ovarian cancer stemness by inducing metabolic reprogramming
Source: Research Square preprint supplement (doi:10.21203/rs.3.rs-7728954/v1), 2025-10-16
Supplement: Supplementary file 2 [file ffdd64435067fbefa419e571.docx]

**Supplementary Table 1. List of resources used in the study**

| **REAGENT or RESOURCE** | | | **SOURCE** | **Dilution** | **IDENTIFIER** |
| --- | --- | --- | --- | --- | --- |
| **Antibodies** | | | | | |
| Mfn1 | | | Cell Signaling Technology | 1:3000 | 14739 |
| Mfn2 | | | Cell Signaling Technology | 1:3000 | 9482 |
| Drp1 | | | Cell Signaling Technology | 1:3000 | 8570 |
| β-Actin | | | Sigma | 1:3000 | A5316 |
| β-Actin | | | Cell Signaling Technology | 1:3000 | 3700 |
| NDUFB8 | | | Abcam | 1:3000 | Ab110242 |
| ATP5A | | | Abcam | 1:3000 | Ab14748 |
| CD133 | | | Cell Signaling Technology | 1:3000 | 64326 |
| MTCO2 | | | Abcam | 1:3000 | Ab110258 |
| UQCRC2 | | | Abcam | 1:2000 | Ab14745 |
| Mitofusin2 | | | Abcam | 1:1500 | Ab186317 |
| CD44 | | | Cell Signaling Technology | 1:3000 | 5640 |
| ABCG2 | | | Cell Signaling Technology | 1:3000 | 42078 |
| Nanog | | | Cell Signaling Technology | 1:2000 | 4903 |
| Sox2 | | | Cell Signaling Technology | 1:2000 | 3579 |
| Oct4 | | | Cell Signaling Technology | 1:3000 | 75463 |
| SDBH | | | Abcam | 1:3000 | Ab14714 |
| Anti-mouse IgG, HRP-linked | | | Cell Signaling Technology | 1:5000 | 7076 |
| Anti-rabbit IgG, HRP-linked | | | Cell Signaling Technology | 1;5000 | 7074 |
| Donkey anti-Rabbit IgG (H+L) Alexa Fluor Plus 488 | | | Thermo Fisher Scientific | 1:500 | A32790 |
| Alexa Flour 568- goat anti-mouse IgG(H+L) | | | Thermo Fisher Scientific | 1:500 | A11004 |
| Atg5(D5F5U) | | | Cell Signaling Technology | 1:3000 | 12994 |
| LC3 A/B(D3U4C) | | | Cell Signaling Technology | 1:3000 | 12741 |
| Fluoreshield with DAPI | | | Sigma | | F6057 |
| LS Columns | | | Miltenybiotech | | 130-042-401 |
| Midi MACS Seperator | | | Miltenybiotech | | 130-042-302 |
| CD133 microBead Kit | | | Miltenybiotech | | 130-100-857 |
| MACS Multi Stand | | | Miltenybiotech | | 130-042-303 |
| **Chemicals** | | | | | |
| Lipofectamine 2000 | | | Thermo Fisher Scientific | | 11668019 |
| 2-Deoxy-D-Glucose | | | Sigma | | D6134 |
| Mitotracker Deep Red | | | Invitrogen | | M22426 |
| MitoSox Red | | | Invitrogen | | M36008 |
| GeneJet Genomic DNA Purification kit | | | Thermo scientific | | K0722 |
| iScriptTM cDNA Synthesis Kit | | | Bio-Rad | | 1708891 |
| iTaq Universal SYBR Green Supermix | | | Bio-Rad | | 1725121 |
| ATP Determination Kit | | | Thermo fischer | | A22066 |
| **Experimental models: cell lines** | | | | | |
| A2780 | | | ECACC | | ECACC 93112519 |
| SKOV-3 | | | ATCC | | HTB-77 |
| OVCAR-3 | | | ATCC | | HTB-161) |
| **Recombinant DNA** | | | | | |
| pLKO.1-puro Empty vector control Plasmid | | | Sigma | | SHC001 |
| shMfn1 | | | Sigma | | Trcn0000300765 |
| **Primers** | | | | | |
| S. No. | Primer | Primer sequence | | | | |
| 1 | 18S | For GCTCTAGAATTACCACAGTTATC | | | | |
| Rev AAATCAGTTATGGTTCCTTTGGT | | | | |
| 2 | Oct4 | For GCTGGAGCAAAACCCGGAGG | | | | |
| Rev TCGGCCTGTGTATATCCCAGGGTG | | | | |
| 3 | Sox2 | For TGATGGAGACGGAGCTGAAG | | | | |
| Rev GCTTGCTGATCTCCGAGTTG | | | | |
| 4 | Nanog | For ACCCAGCTGTGTGTACTCAA | | | | |
| Rev GGAAGAGTAAAGGCTGGGGT | | | | |
| 5 | Nestin | For TCTTTGCTCCCAGTCCTGAG | | | | |
| Rev GGGCTCTGATTCCTGCATCT | | | | |
| 6 | CytC | For TTGCACTTACACCGGTACTTAAGC | | | | |
| Rev ACGTCCCCACTCTCTAAGTCCAA | | | | |
| 7 | Cox4I | For GGCCCGGCATTTTACGA | | | | |
| Rev TCACCGTGGAGCGGAAA | | | | |
| 8 | Cox5b | For TGCGCTCCATGGCATCA | | | | |
| Rev CCCAGTCGCCTGCTCTTC | | | | |
| 9 | ATP5A1 | For TGCAAGGACTTCCATGCCTC | | | | |
| Rev CGCCCAGGTTCTTCAAGATCAA | | | | |
| **Mitochondrial DNA quantification** | | | | | | |
| S.No. | Primer | Primer Sequence | | | | |
| 1 | ND1 | For CCCTAAAACCCGCCACATCT | | | | |
| Rev TAGAAGAGCGATGGTGAGAGCTAA | | | | |
| 2. | β-Actin | For CCCAGCCATGTACGTTGCTA | | | | |
|  |  | Rev CGTCACCGGAGTCCATCAC | | | | |
